# Supplementary material for: Single-walled carbon nanotubes templated CuO networks for gas sensing
Source: Royal Society of Chemistry journal article supplement (doi:10.1039/c6tc01722c), 2016-01-01
Supplement: c6tc01722c1.pdf [file c6tc01722c1.pdf]

Electronic supplementary information:

**Single-Walled Carbon Nanotubes Templated CuO Networks for Gas Sensing**

Guiming Peng,<sup>a, b, c</sup> Suqin Wu,<sup>a</sup> James E. Ellis,<sup>b</sup> Xueqing Xu,<sup>c</sup> Gang Xu,<sup>c</sup> Changlin Yu<sup>a</sup> and Alexander Star\*<sup>b</sup>

<sup>a</sup>School of Metallurgy and Chemical Engineering, Jiangxi University of Science and Technology, Ganzhou 341000, Jiangxi, China

<sup>b</sup>Department of Chemistry, University of Pittsburgh, Pittsburgh, Pennsylvania, 15260, USA.

<sup>c</sup>CAS Key Laboratory of Renewable Energy, Guangzhou Institute of Energy Conversion, Chinese Academy of Sciences, Guangzhou 510640, Guangdong, China

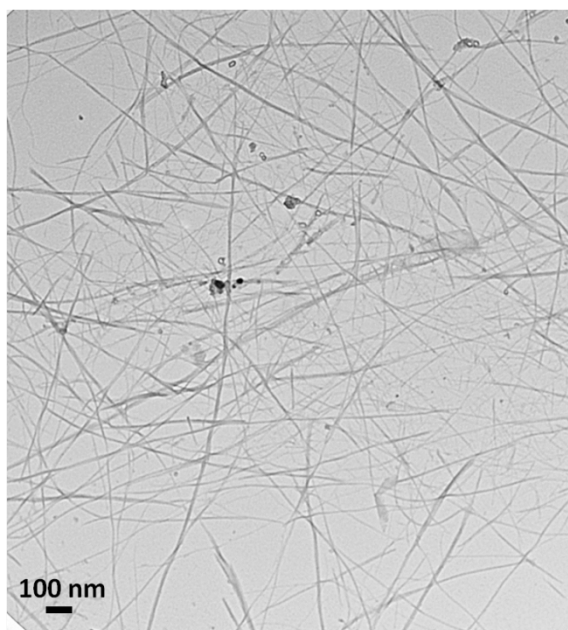

Figure S1. TEM of o-SWCNTs.

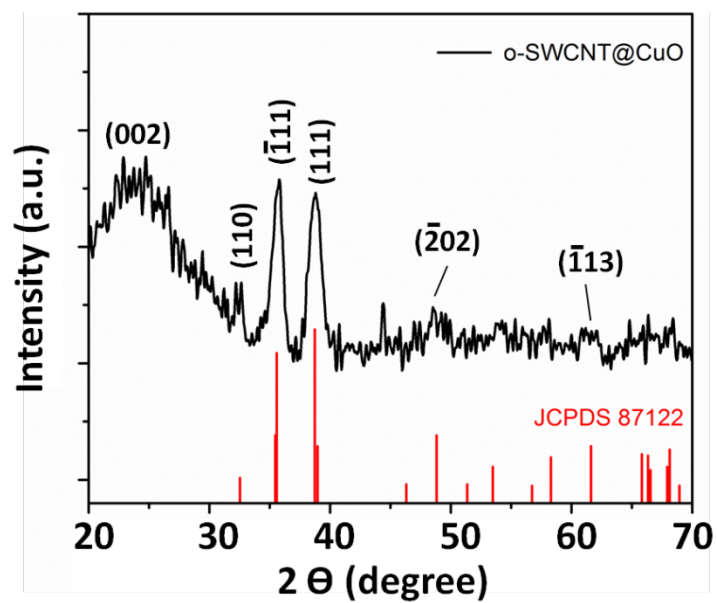

Figure S2. XRD spectrum of the o-SWCNT@CuO composite.

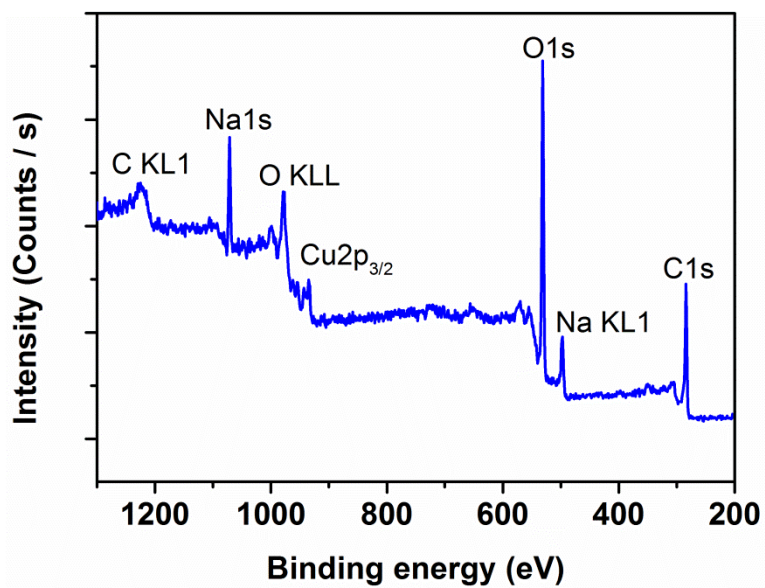

Figure S3. XPS spectra of o-SWCNT@CuO. Na signal is from the glass slide.

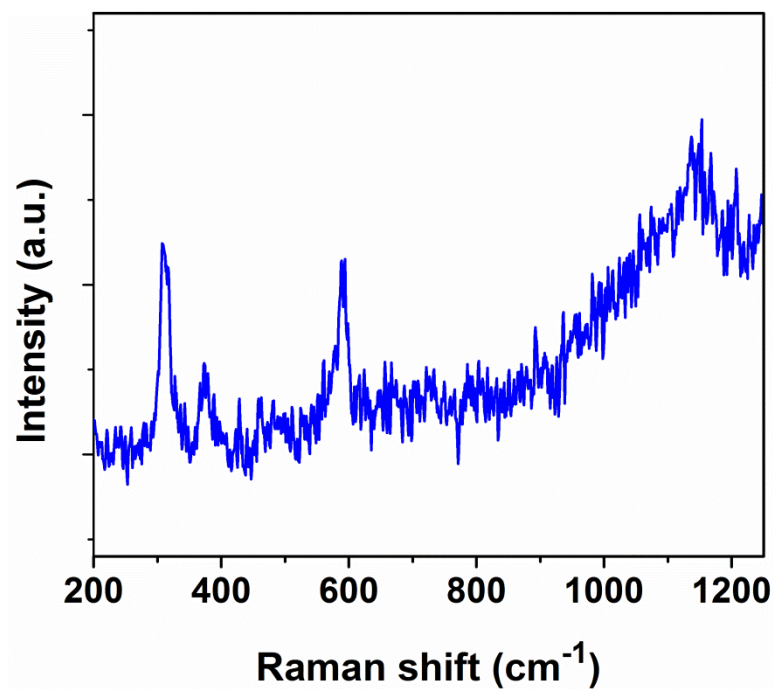

Figure S4. Raman spectra of CuO@o-SWCNT.

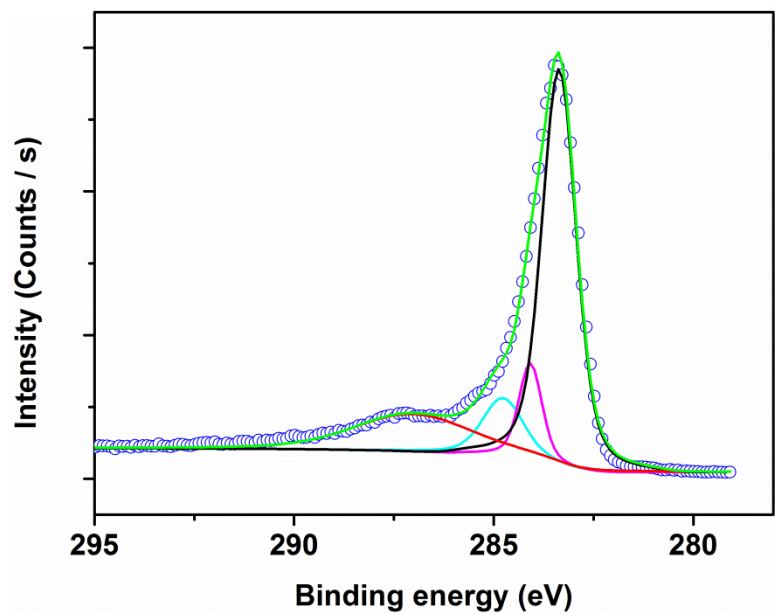

Figure S5. Pristine (P3) o-SWCNT C1s XPS spectra.

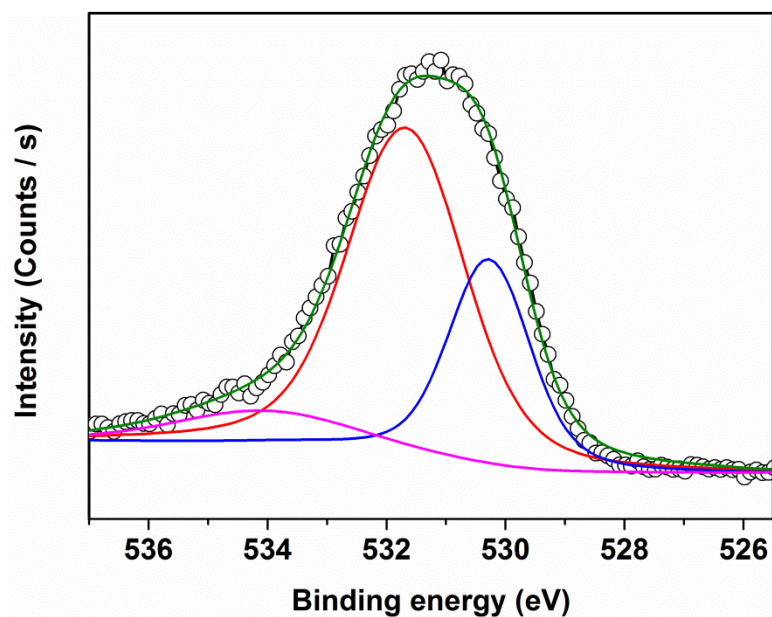

**Figure S6.** O1s XPS spectra of o-SWCNT.

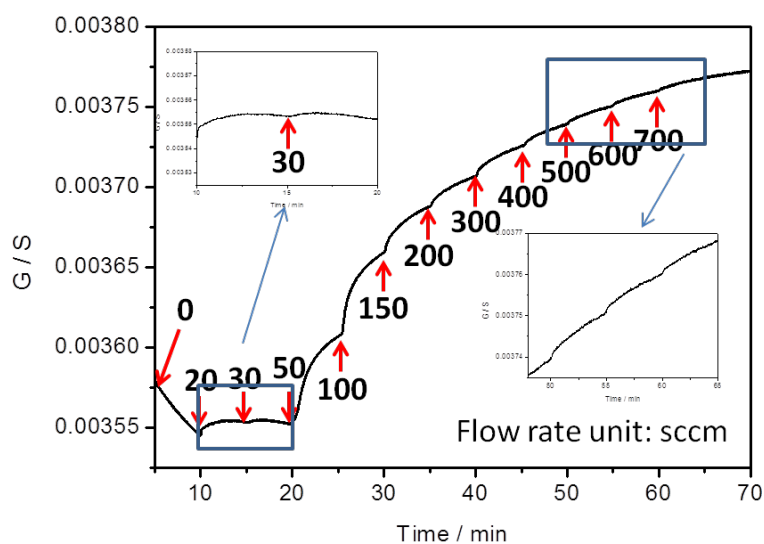

**Figure S7.** Influence of N<sub>2</sub> flow rate on the conductance.

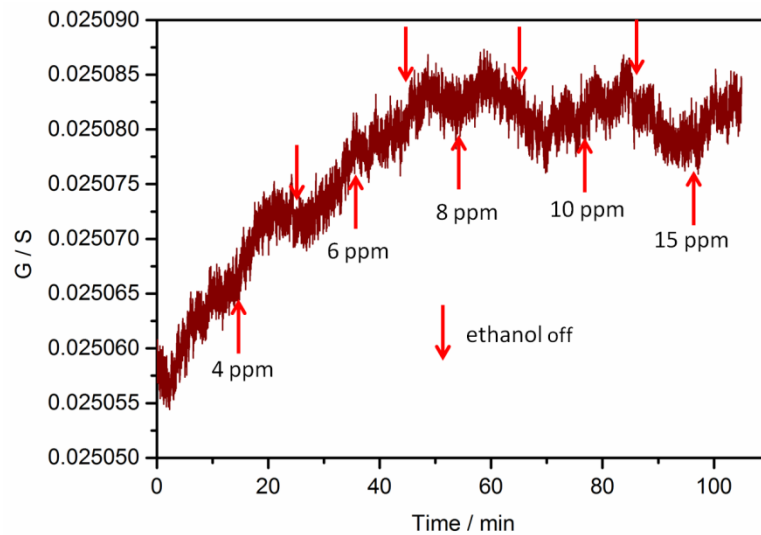

**Figure S8.** Ethanol sensing performance of pristine o-SWCNT.

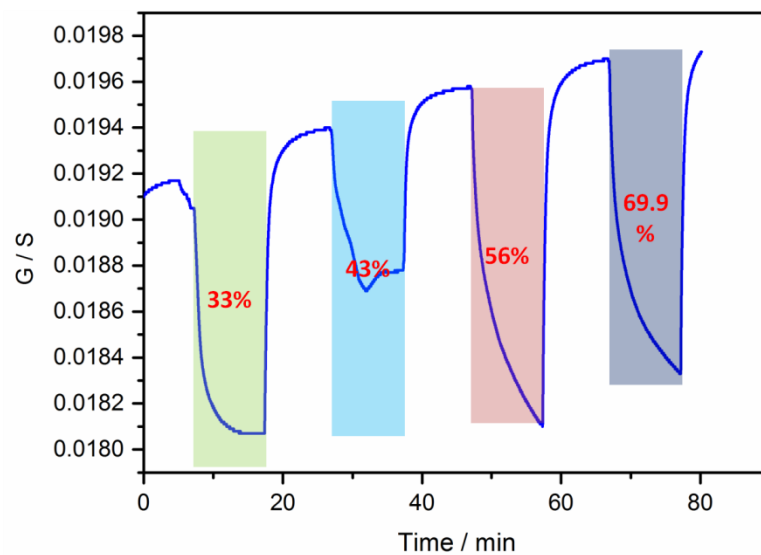

**Figure S9.** Humidity sensing performance of pristine o-SWCNT.

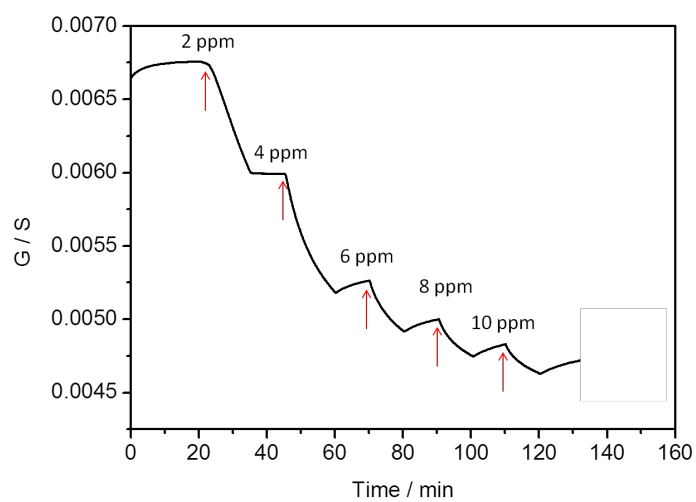

**Figure S10.** H<sub>2</sub>S sensing performance of SWCNT/CuO composite.

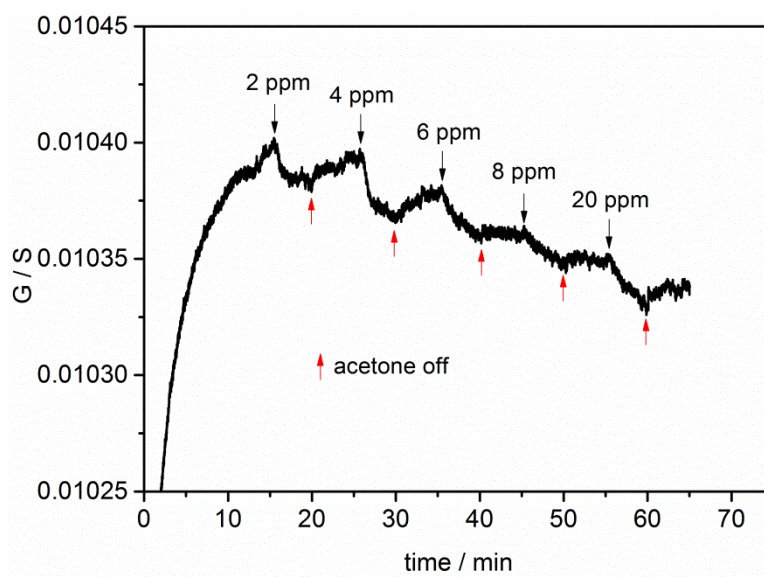

**Figure S11.** Acetone sensing behavior of SWCNT/CuO composite.
